# Supplementary material for: Massive Integration of Planktonic Cells within a Developing Biofilm
Source: MDPI journal article supplement (doi:10.3390/microorganisms9020298), 2021-02-02
Supplement: s1 [file s1]

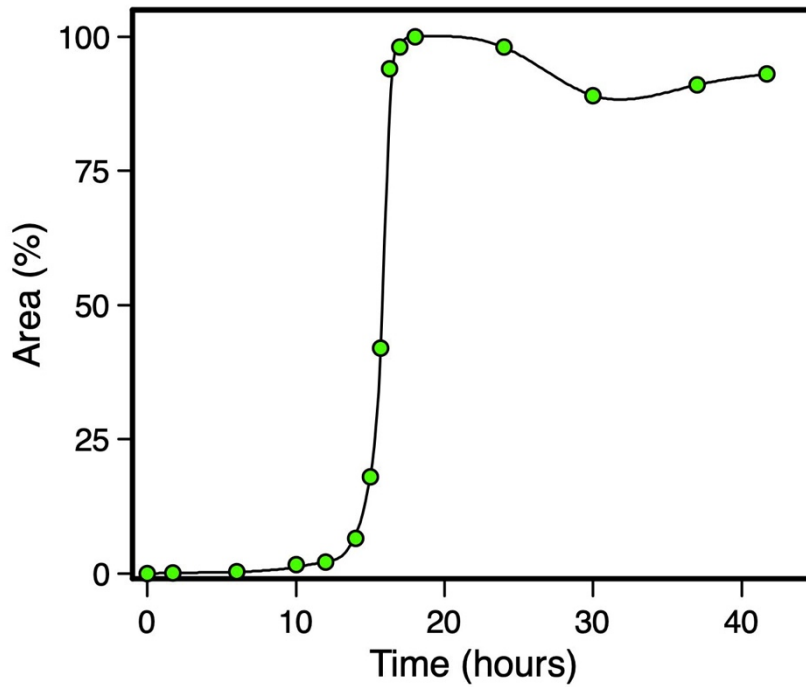

Figure S1 : Area covered by the biofilm as a function of time.

Images taken from video S3 were converted to black and white pictures, subtracted with the time 0 image, and analyzed by ImageJ to determine the number of pixels which display a value above the empty surface background (pixel values from 20 to 255, 0 is black and 255 is white). The number of pixels obtained was then converted to the percentage of surface occupied by the biofilm (Area %, Y-axis)
