# Supplementary material for: Massive Integration of Planktonic Cells within a Developing Biofilm
Source: MDPI journal article supplement (doi:10.3390/microorganisms9020298), 2021-02-02
Supplement: s1 [file s1]

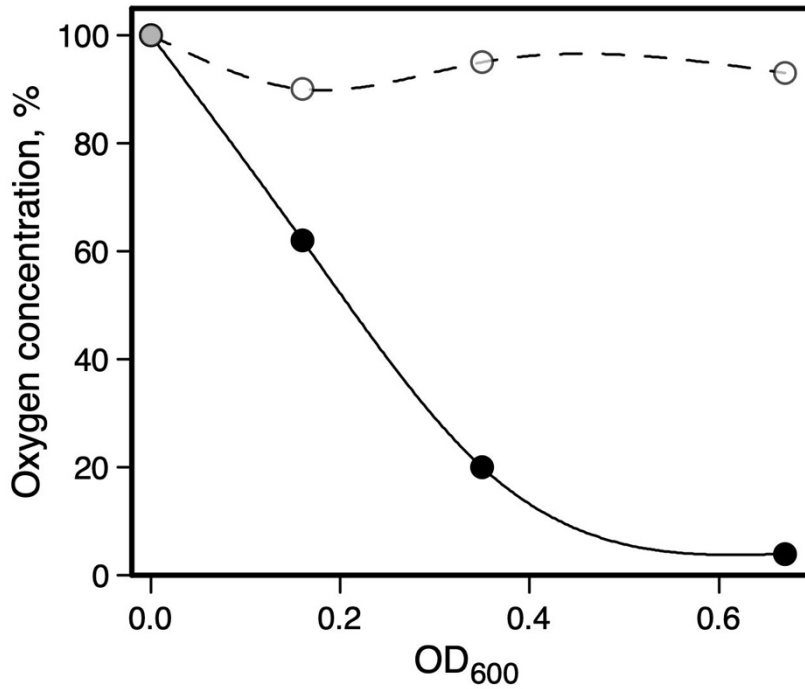

**Figure S2** : Dissolved oxygen concentration in the culture medium during planktonic growth. A 25 ml planktonic culture of the *B. thuringiensis* 407 strain, seeded at OD<sub>600</sub> 0.01 in HCT medium, was grown at 30°C in static conditions in 2.5 cm diameter polyethylene tubes. No biofilm could be produced in these conditions. The dissolved oxygen was measured at the tube mid-height with a Mettler-Toledo oxymeter Seven2Go equipped with an Inlab 605-ISM electrode, at different times. One tube was used per measurement. Black circles : dissolved oxygen in the planktonic culture. Open circles : unseeded tubes, used as controls. The dissolved oxygen concentration at time zero was set to 100%. The oxygen concentration is expressed as a function of the OD<sub>600</sub> of the planktonic population at the time of measurement.
